# Supplementary material for: Microwave-assisted synthesis of novel nanostructured Zn3(OH)2V2O7·2H2O and Zn2V2O7 as electrode materials for supercapacitors
Source: Royal Society of Chemistry journal article supplement (doi:10.1039/c7nj03262e), 2017-01-01
Supplement: c7nj03262e1.pdf [file c7nj03262e1.pdf]

## Electronic Supporting Information

Microwave-assisted Synthesized of Novel Nanostructured  
 $\text{Zn}_3(\text{OH})_2\text{V}_2\text{O}_7 \cdot 2\text{H}_2\text{O}$  and  $\text{Zn}_2\text{V}_2\text{O}_7$  as Electrode Materials for  
Supercapacitors

Comment [□□□]: Microwave-assisted synthesis of novel nanostructured  $\text{Zn}_3(\text{OH})_2\text{V}_2\text{O}_7 \cdot 2\text{H}_2\text{O}$  and  $\text{Zn}_2\text{V}_2\text{O}_7$  as electrode materials for supercapacitors

Yingdi Li,<sup>a</sup> Yifei Teng,<sup>a</sup> Ziqing Zhang,<sup>a</sup> Yi Feng,<sup>a</sup> Peng Xue,<sup>a</sup> Wenming Tong,<sup>a</sup> and Xiaoyang

Liu<sup>a\*</sup>

<sup>a</sup> State key Laboratory of Inorganic Synthesis and Preparative Chemistry, College of Chemistry, Jilin University, Changchun 130012, China. Tel/Fax: +86-0431-85168316. E-mail: liuxy@jlu.edu.cn

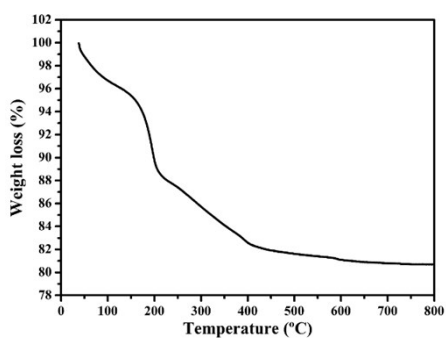

Fig. S1 TGA curve of the as-synthesized precursor  $\text{Zn}_3(\text{OH})_2\text{V}_2\text{O}_7 \cdot 2\text{H}_2\text{O}$ .

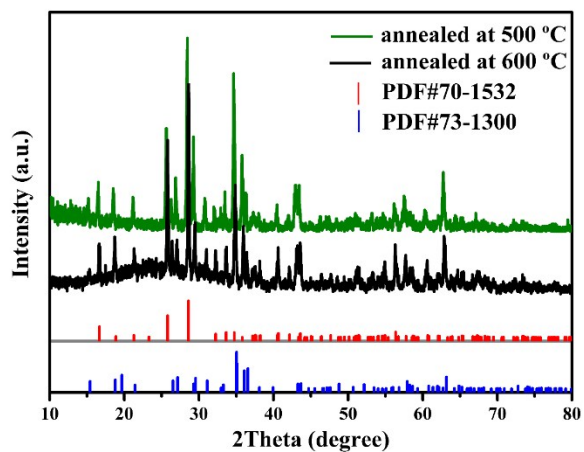

Fig. S2 XRD patterns of the post-calcination products obtained at 500 °C and 600 °C.

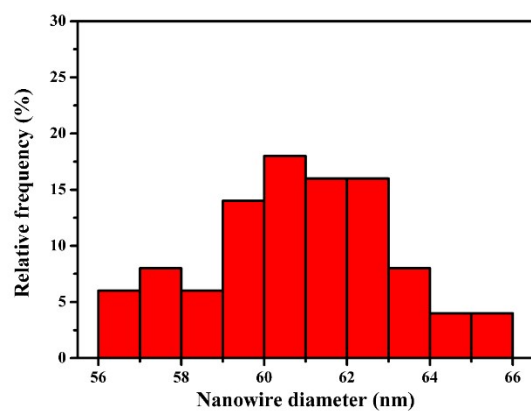

Fig. S3 Statistical analysis of nanowire diameter of  $\text{Zn}_3(\text{OH})_2\text{V}_2\text{O}_7 \cdot 2\text{H}_2\text{O}$ .

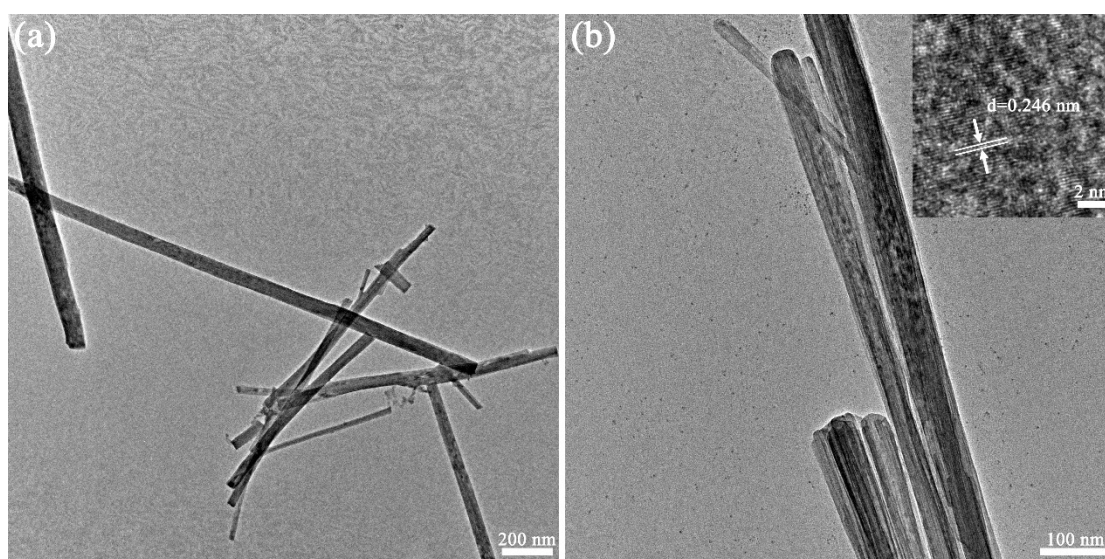

Fig. S4 TEM (a and b) and HRTEM (inset b) images of  $\text{Zn}_3(\text{OH})_2\text{V}_2\text{O}_7 \cdot 2\text{H}_2\text{O}$ .

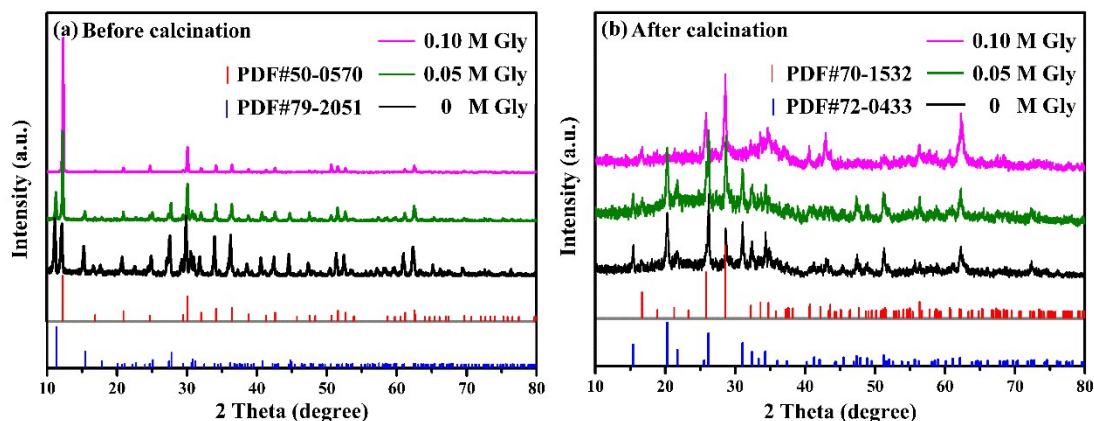

Fig. S5 XRD patterns of (a)  $\text{Zn}_3(\text{OH})_2\text{V}_2\text{O}_7 \cdot 2\text{H}_2\text{O}$  and (b)  $\text{Zn}_2\text{V}_2\text{O}_7$  with glycine concentration: 0, 0.05, 0.1 M.

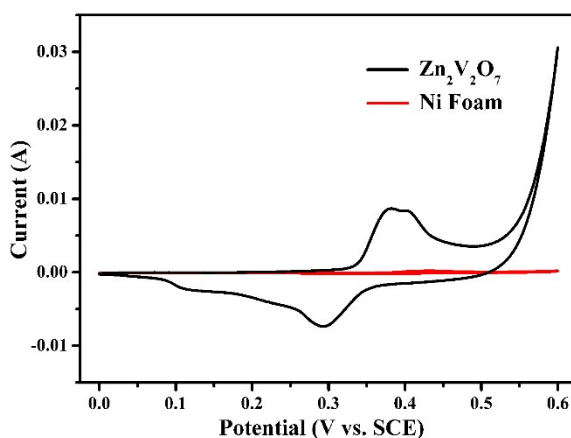

Fig. S6 Cyclic Voltammetry (CV) curves of  $\text{Zn}_2\text{V}_2\text{O}_7$  and nickel foam at  $5 \text{ mV s}^{-1}$ .

As shown in Fig. S7, we compared the typical cyclic voltammogram (CV) curves of the pure nickel foam and nickel foam with active materials  $\text{Zn}_2\text{V}_2\text{O}_7$  at the same scan rate of  $5 \text{ mV s}^{-1}$  in the potential window of 0 to 0.6 V. According to the CV curves, the capacitive current of the Ni foam was almost a straight line, while there was a strong pair of redox peaks in the CV curves of the  $\text{Zn}_2\text{V}_2\text{O}_7$  electrode, which meant reversible Faraday redox reactions. The strong contrast between the CV curves of the pure nickel foam and the nickel foam with active materials  $\text{Zn}_2\text{V}_2\text{O}_7$  had indeed indicated that the influence of the Ni foam can be neglected, and the specific capacitance was really from the nanowire shaped  $\text{Zn}_2\text{V}_2\text{O}_7$  materials.

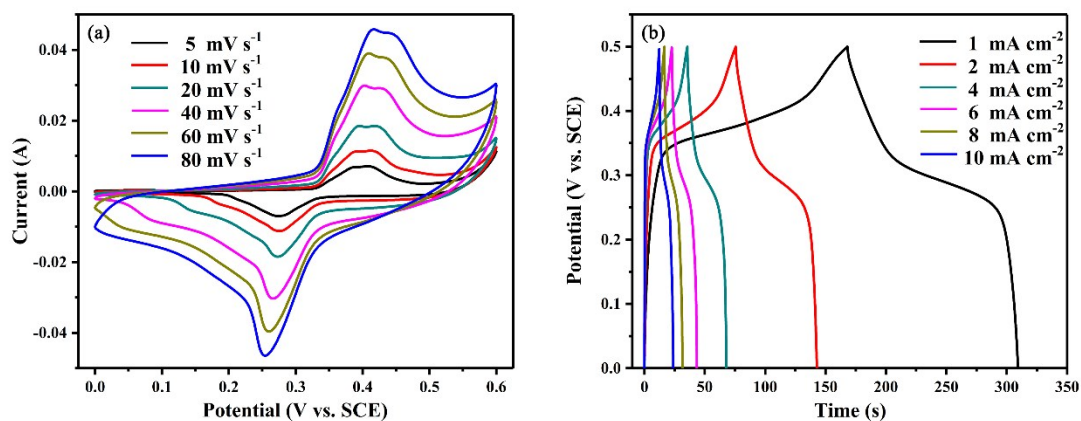

Fig. S7 Comparison of electrochemical properties of  $\text{Zn}_3(\text{OH})_2\text{V}_2\text{O}_7 \cdot 2\text{H}_2\text{O}$  nanowires: (a) CV curves at scan rates of 5, 10, 20, 40, 60, 80  $\text{mV s}^{-1}$ . (b) CD curves at current densities of 1, 2, 4, 6, 8, 10  $\text{mA cm}^{-2}$ .

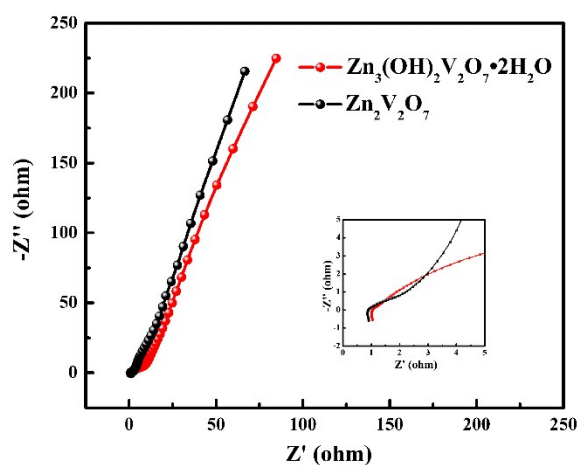

Fig. S8. EIS curves of the  $\text{Zn}_3(\text{OH})_2\text{V}_2\text{O}_7 \cdot 2\text{H}_2\text{O}$  and  $\text{Zn}_2\text{V}_2\text{O}_7$  electrodes in 6 M KOH solution (the inset shows the magnified electrochemical impedance spectrum).

Table S1 The comparison results of electrochemical performance for the  $\text{Zn}_2\text{V}_2\text{O}_7$  materials and other similar zinc compounds electrodes.

| Electrode materials                      | Specific capacitance                             | Energy density             | Power density             | Ref.     |
|------------------------------------------|--------------------------------------------------|----------------------------|---------------------------|----------|
| $\text{Zn}_2\text{V}_2\text{O}_7$        | 427.7 F g <sup>-1</sup> (1 mA cm <sup>-2</sup> ) | 18.7 W h kg <sup>-1</sup>  | 272.7 W kg <sup>-1</sup>  | Our work |
| ZnO/carbon nanotube                      | 48 F g <sup>-1</sup> (1 mA cm <sup>-2</sup> )    | 13.1 W h kg <sup>-1</sup>  | 792 W kg <sup>-1</sup>    | 46       |
| PPy/GO/ZnO nanocomposite                 | 94.6 F g <sup>-1</sup> (1 A g <sup>-1</sup> )    | 10.65 W h kg <sup>-1</sup> | 258.26 W kg <sup>-1</sup> | 47       |
| ZnCo <sub>2</sub> O <sub>4</sub> nanorod | 10.9 F g <sup>-1</sup> (30 mV s <sup>-1</sup> )  | 76 mW h kg <sup>-1</sup>   | 1.9 W kg <sup>-1</sup>    | 48       |
